# Supplementary material
Source: MDPI journal article supplement (https://www.mdpi.com/1999-4907/13/10/1654)
Supplement: s1 [file s1]

**Table S1.** Statistical characteristics of tree ring  $\delta^{18}\text{O}$  time series.

| Statistical parameters                        | 07A         | 31B         | 30A         | 19A         | 22A         | 05B         |
|-----------------------------------------------|-------------|-------------|-------------|-------------|-------------|-------------|
| Time period                                   | 1784–2013   | 1814–2013   | 1784–2013   | 1764–2013   | 1920–2013   | 1950–2013   |
| $\delta^{18}\text{O}_{\text{tree}}$ Range (‰) | 24.41–35.01 | 25.45–33.60 | 25.03–34.32 | 25.66–36.01 | 27.16–32.87 | 27.06–32.09 |
| Mean value (‰)                                | 29.89       | 30.08       | 30.47       | 30.14       | 29.79       | 29.67       |
| Standard deviation(‰)                         | 1.80        | 1.46        | 1.57        | 1.91        | 1.41        | 1.28        |
| Skewness                                      | –0.32       | –0.31       | –0.39       | 0.14        | 0.08        | –0.21       |
| Kurtosis                                      | 0.01        | 0.03        | 0.34        | 0.16        | –0.70       | –0.87       |
| Autocorrelation                               | 0.47        | 0.29        | 0.37        | 0.40        | 0.24        | 0.07        |

**Table S2.** Correlation coefficients among individual tree ring  $\delta^{18}\text{O}$  series.

|     | 07A      | 31B      | 30A      | 19A     | 22A     | 05B |
|-----|----------|----------|----------|---------|---------|-----|
| 07A | 1        |          |          |         |         |     |
| 31B | 0.67/171 | 1        |          |         |         |     |
| 30A | 0.55/194 | 0.70/164 | 1        |         |         |     |
| 19A | 0.68/192 | 0.66/163 | 0.68/187 | 1       |         |     |
| 22A | 0.63/84  | 0.78/83  | 0.72/80  | 0.58/80 | 1       |     |
| 05B | 0.55/50  | 0.73/55  | 0.65/58  | 0.63/54 | 0.63/63 | 1   |

**Table S3.** Statistical characteristics of composite  $\delta^{18}\text{O}$  chronology.

| Statistical term | Sequence length | Start and end year | Skewness | Kurtosis | Mean correlation within series |
|------------------|-----------------|--------------------|----------|----------|--------------------------------|
| Statistic        | 230             | 1784–2013 AD       | –0.19    | –0.34    | 0.66                           |

**Table S4.** Calibration and verification statistics for the  $P_{J-J}$  reconstruction in Heng Mountain.

| Calibration | r       | ST        | t      | Verification | r       | RE   | CE   | ST       | t      |
|-------------|---------|-----------|--------|--------------|---------|------|------|----------|--------|
| Period      |         |           |        | Period       |         |      |      |          |        |
| 1957–1985   | −0.73** | 26+/3−**  | 4.48** | 1986–2013    | −0.62** | 0.36 | 0.34 | 21+/7−** | 5.21** |
| 1985–2013   | −0.63** | 23+/6−**  | 5.13** | 1957–1984    | −0.72** | 0.49 | 0.48 | 24+/4−** | 4.20** |
| 1957–2013   | −0.67** | 47+/10−** | 6.59** |              |         |      |      |          |        |

Note: \*\* represents the significance is at the 99.9% confidence level.

**Table S5.** Comparisons between the reconstructed precipitation and historical records.

| Dry  | Precipitation |                       | Wet  | Precipitation |                         |
|------|---------------|-----------------------|------|---------------|-------------------------|
| year | n             | Historical records    | year | n             | Historical records      |
|      | (mm)          |                       |      | (mm)          |                         |
|      |               | The great drought and |      |               |                         |
|      |               | famine led to grain   |      |               | After the flood, plague |
| 1792 | 33.52         | prices soaring, and   | 1822 | 231.83        | ensued, and countless   |
|      |               | people had to sell    |      |               | houses collapsed.       |
|      |               | children to live.     |      |               |                         |
|      |               | Huge swarms of        |      |               | The Yellow River        |
| 1832 | 97.78         | locusts had destroyed | 1912 | 275.78        | flood caused some       |
|      |               | crops and people      |      |               | villages submerged.     |
|      |               | suffer hunger.        |      |               |                         |
|      |               | Locust plague         |      |               | Flood hit 38 counties   |
|      |               | resulted in poor      |      |               | in Shanxi Province,     |
| 1836 | 94.04         | harvests, and people  | 1939 | 258.12        | and the north was       |
|      |               | were homeless and     |      |               | worst.                  |
|      |               | dead.                 |      |               |                         |

|      |        |                                                                                                                                                                                                     |      |        |                                                                               |
|------|--------|-----------------------------------------------------------------------------------------------------------------------------------------------------------------------------------------------------|------|--------|-------------------------------------------------------------------------------|
| 1877 | 116.35 | Widespread and prolonged drought make people eat weeds and bark to stay alive, and some starved to death.                                                                                           | 1950 | 279.86 | Flash floods and hail occurred simultaneously, people suffering great losses. |
| 1928 | 112.97 | Great drought covered over whole province, causing enormous casualties and property losses. The drought had left 1.87 million of people and 31 thousand head of livestock in Shanxi short of water. | 1954 | 291.23 | Serious floods greatly decreased food production, hitting 1273 villages.      |
| 1972 | 89.91  |                                                                                                                                                                                                     | 1996 | 257.61 | Rainstorm resulted in destruction of many croplands and houses.               |

**Table S6.** Correlation between several Asian summer monsoon indices and the reconstructed precipitation.

| Monsoon indices        | Reference              | Defining variable(s), level (hPa), and regions | Reanalysis data       | Correlation coefficient           |
|------------------------|------------------------|------------------------------------------------|-----------------------|-----------------------------------|
| I <sub>ZTC</sub>       | Zhang et al., 2003     | vorticity, 850, (10°–35°N, 100°–150°E)         | 20CR (1851–2013)      | $r=0.23, n=163, p < 0.005$ (June) |
| I <sub>WY</sub> (SAMI) | Webster and Yang, 1992 | u, 200–850, (0°–20°N, 40°–110°E)               | NCEP/NCAR (1948–2013) | $r=0.44, n=66, p < 0.001$ (May)   |

|                            |                                                |                                             |                          |                      |
|----------------------------|------------------------------------------------|---------------------------------------------|--------------------------|----------------------|
| I <sub>ZHW</sub>           | Zhu et al., 2000                               | u, 850–200                                  | NCEP/NCAR<br>(1948–2013) | $r=0.45, n=66, p <$  |
|                            |                                                | (0°–10°N,<br>100°–130°E)                    |                          | 0.001<br>(May)       |
| I <sub>LKY</sub><br>(SAMI) | Lau and Yang,<br>2000                          | v, 850–300,<br>(10°–30°N,<br>70°–110°E)     | JRA-55<br>(1958–2013)    | $r=0.37, n=56, p <$  |
|                            |                                                |                                             |                          | 0.005<br>(June–July) |
| I <sub>LKY</sub><br>(EAMI) |                                                | u, 200,<br>(20°–50°N,<br>100°–150°E)        | 20CR<br>(1851–2013)      | $r=0.20, n=163, p <$ |
|                            |                                                |                                             |                          | 0.01<br>(July)       |
| AIRI                       | Indian Institute of<br>Tropical<br>Meteorology | monthly All-India<br>Rainfall precipitation | (1871–2013)              | $r=0.24, n=142, p <$ |
|                            |                                                |                                             |                          | 0.005<br>(May–July)  |

---

Note: here, u=zonal winds, v=meridional winds.

**Table S7.** Cross-dating results of tree-ring samples in Heng Mountain.

| Seq                     | Series | Time_span | 1725<br>1774 | 1750<br>1799 | 1775<br>1824 | 1800<br>1849 | 1825<br>1874 | 1850<br>1899 | 1875<br>1924 | 1900<br>1949 | 1925<br>1974 | 1950<br>1999 | 1975<br>2024 |
|-------------------------|--------|-----------|--------------|--------------|--------------|--------------|--------------|--------------|--------------|--------------|--------------|--------------|--------------|
| 1                       | hs02a  | 1772 2014 |              | .70          | .71          | .76          | .67          | .66          | .64          | .57          | .56          | .70          | .77          |
| 2                       | hs02b  | 1767 2014 |              | .83          | .73          | .62          | .74          | .72          | .59          | .50          | .50          | .63          | .68          |
| 3                       | hs03a  | 1763 2014 |              | .65          | .72          | .71          | .86          | .74          | .75          | .84          | .75          | .74          | .73          |
| 4                       | hs03b  | 1789 2014 |              |              | .44          | .56          | .89          | .80          | .76          | .85          | .81          | .84          | .89          |
| 5                       | hs04a  | 1787 2014 |              |              | .64          | .68          | .88          | .88          | .82          | .82          | .81          | .84          | .85          |
| 6                       | hs04b  | 1787 2014 |              |              | .70          | .77          | .92          | .84          | .82          | .79          | .70          | .81          | .85          |
| 7                       | hs05a  | 1767 2014 |              | .86          | .85          | .85          | .88          | .90          | .92          | .91          | .87          | .86          | .85          |
| 8                       | hs05b  | 1767 2014 |              | .87          | .87          | .83          | .89          | .91          | .89          | .84          | .68          | .77          | .80          |
| 9                       | hs06a  | 1830 2014 |              |              |              |              | .87          | .84          | .83          | .91          | .84          | .78          | .82          |
| 10                      | hs06b  | 1769 2014 |              | .86          | .85          | .83          | .92          | .88          | .88          | .94          | .84          | .66          | .73          |
| 11                      | hs07a  | 1786 2014 |              |              | .78          | .69          | .80          | .80          | .78          | .62          | .31A         | .45          | .57          |
| 12                      | hs07b  | 1786 2014 |              |              | .63          | .52          | .62          | .62          | .75          | .77          | .66          | .71          | .80          |
| 13                      | hs08a  | 1769 2014 |              | .73          | .72          | .66          | .89          | .85          | .91          | .93          | .88          | .80          | .81          |
| 14                      | hs08b  | 1822 2013 |              |              |              | .85          | .85          | .79          | .65          | .86          | .86          | .81          | .81          |
| 15                      | hs08c  | 1745 1875 | .56          | .56          | .58          | .41          | .86          | .86          |              |              |              |              |              |
| 16                      | hs09a  | 1772 2014 |              | .84          | .84          | .82          | .90          | .87          | .85          | .90          | .84          | .79          | .86          |
| 17                      | hs09b  | 1772 2014 |              | .81          | .81          | .70          | .72          | .71          | .74          | .74          | .66          | .67          | .77          |
| 18                      | hs10a  | 1765 1948 |              | .84          | .79          | .75          | .67          | .70          | .83          | .83          |              |              |              |
| 19                      | hs10b  | 1765 2014 |              | .84          | .70          | .61          | .75          | .86          | .86          | .87          | .75          | .70          | .78          |
| 20                      | hs11a  | 1757 2013 |              | .76          | .79          | .73          | .87          | .93          | .88          | .83          | .82          | .87          | .87          |
| 21                      | hs11b  | 1757 2013 |              | .81          | .86          | .88          | .84          | .82          | .90          | .84          | .81          | .82          | .81          |
| 22                      | hs12a  | 1782 1949 |              |              | .70          | .56          | .62          | .66          | .85          | .87          |              |              |              |
| 23                      | hs12b  | 1782 2003 |              |              | .80          | .77          | .88          | .87          | .89          | .89          | .75          | .48          | .41          |
| 24                      | hs13a  | 1776 2014 |              |              | .87          | .80          | .84          | .88          | .86          | .77          | .65          | .71          | .73          |
| 25                      | hs13b  | 1776 2014 |              |              | .78          | .79          | .92          | .87          | .88          | .91          | .86          | .77          | .76          |
| 26                      | hs14a  | 1753 2014 |              | .42          | .52          | .74          | .88          | .80          | .78          | .85          | .85          | .70          | .72          |
| 27                      | hs14b  | 1753 2014 |              | .38          | .46          | .71          | .86          | .82          | .86          | .92          | .88          | .84          | .85          |
| 28                      | hs15a  | 1798 2014 |              |              | .73          | .72          | .79          | .78          | .74          | .80          | .82          | .81          | .81          |
| 29                      | hs15b  | 1805 2014 |              |              |              | .67          | .77          | .73          | .74          | .87          | .83          | .79          | .86          |
| 30                      | hs16a  | 1810 2014 |              |              |              | .85          | .90          | .87          | .89          | .91          | .80          | .77          | .83          |
| 31                      | hs16b  | 1810 2013 |              |              |              | .79          | .88          | .91          | .82          | .85          | .84          | .81          | .87          |
| 32                      | hs17a  | 1790 2013 |              |              | .75          | .78          | .87          | .87          | .81          | .86          | .83          | .78          | .84          |
| 33                      | hs17b  | 1790 2011 |              |              | .65          | .70          | .83          | .91          | .92          | .93          | .92          | .88          | .76          |
| 34                      | hs18a  | 1842 2013 |              |              |              |              | .93          | .93          | .86          | .88          | .85          | .73          | .77          |
| 35                      | hs18b  | 1794 2014 |              |              | .58          | .64          | .89          | .91          | .90          | .90          | .84          | .78          | .81          |
| 36                      | hs19a  | 1765 2014 |              | .88          | .89          | .87          | .92          | .90          | .93          | .90          | .86          | .89          | .87          |
| 37                      | hs19b  | 1759 2014 |              | .80          | .92          | .86          | .87          | .88          | .94          | .94          | .84          | .84          | .86          |
| 38                      | hs20a  | 1795 2014 |              |              | .81          | .80          | .86          | .81          | .80          | .81          | .65          | .45          | .59          |
| 39                      | hs20b  | 1795 2014 |              |              | .86          | .87          | .89          | .81          | .84          | .90          | .87          | .80          | .79          |
| 40                      | hs21a  | 1778 2014 |              |              | .86          | .86          | .92          | .85          | .78          | .83          | .83          | .83          | .80          |
| 41                      | hs21b  | 1830 2014 |              |              |              |              | .89          | .88          | .80          | .80          | .83          | .75          | .73          |
| 42                      | hs22a  | 1773 2014 |              | .85          | .85          | .73          | .72          | .76          | .89          | .93          | .87          | .86          | .86          |
| 43                      | hs22b  | 1768 2014 |              | .91          | .90          | .84          | .90          | .90          | .85          | .88          | .83          | .79          | .84          |
| 44                      | hs23a  | 1778 2014 |              |              | .90          | .88          | .92          | .92          | .88          | .90          | .92          | .83          | .85          |
| 45                      | hs23b  | 1774 2014 |              | .86          | .87          | .79          | .82          | .75          | .77          | .82          | .75          | .74          | .81          |
| 46                      | hs24a  | 1783 2014 |              |              | .67          | .72          | .76          | .68          | .66          | .75          | .62          | .61          | .74          |
| 47                      | hs24b  | 1763 2014 |              | .77          | .78          | .80          | .80          | .67          | .71          | .74          | .64          | .68          | .76          |
| 48                      | hs25a  | 1803 2014 |              |              |              | .42          | .80          | .68          | .59          | .78          | .70          | .69          | .79          |
| 49                      | hs25b  | 1787 2014 |              |              | .72          | .65          | .78          | .74          | .67          | .75          | .79          | .72          | .79          |
| 50                      | hs26a  | 1771 2014 |              | .73          | .71          | .72          | .91          | .90          | .88          | .92          | .88          | .86          | .90          |
| 51                      | hs26b  | 1760 2014 |              | .83          | .82          | .74          | .91          | .92          | .89          | .90          | .87          | .84          | .84          |
| 52                      | hs27a  | 1759 2014 |              | .64          | .70          | .70          | .86          | .88          | .90          | .92          | .86          | .80          | .86          |
| 53                      | hs27b  | 1742 2014 | .48          | .48          | .82          | .70          | .80          | .83          | .82          | .84          | .78          | .81          | .83          |
| 54                      | hs28a  | 1782 2014 |              |              | .74          | .67          | .78          | .78          | .70          | .80          | .76          | .73          | .81          |
| 55                      | hs28b  | 1790 2014 |              |              | .68          | .79          | .91          | .77          | .77          | .88          | .86          | .82          | .79          |
| 56                      | hs29a  | 1801 2014 |              |              |              | .57          | .82          | .82          | .87          | .94          | .80          | .77          | .85          |
| 57                      | hs29b  | 1801 2013 |              |              |              | .62          | .81          | .84          | .90          | .88          | .79          | .73          | .77          |
| 58                      | hs30a  | 1785 2014 |              |              | .79          | .62          | .83          | .94          | .84          | .83          | .89          | .83          | .79          |
| 59                      | hs30b  | 1772 2014 |              | .82          | .81          | .65          | .80          | .88          | .89          | .93          | .89          | .82          | .80          |
| 60                      | hs31a  | 1781 2014 |              |              | .38          | .33A         | .44          | .39          | .74          | .83          | .74          | .75          | .84          |
| 61                      | hs31b  | 1805 2014 |              |              |              | .20B         | .43          | .31A         | .37          | .70          | .79          | .68          | .68          |
| Av. segment correlation |        |           | .52          | .75          | .75          | .71          | .82          | .81          | .81          | .84          | .79          | .76          | .79          |
